# Supplementary material for: Global fatal landslide occurrence from 2004 to 2016
Source: Copernicus journal article supplement (doi:10.5194/nhess-18-2161-2018), 2018-08-23
Supplement: Supplementary file 1 [file nhess-18-2161-2018-supplement.pdf]

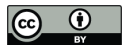

## *Supplement of*

## **Global fatal landslide occurrence from 2004 to 2016**

**Melanie J. Froude and David N. Petley**

*Correspondence to:* Melanie J. Froude ([m.froude@sheffield.ac.uk](mailto:m.froude@sheffield.ac.uk))

The copyright of individual parts of the supplement might differ from the CC BY 4.0 License.

## Spreadsheet

| Total num | Date       | Day | Month | Year | Continent  | Country    | Continent ID | Country ID | Fatalities | Trigger | Cause      | Where             | at work/h | Who        | Male/Fem | Elderly in | Location                                      | Multiple | Type | Injuries | Damage | Notes                             | Report 1                                                            | Source 1 | Report 2 | Source 2 | Report 3 | Source 3 | Report 4 | Source 4 |
|-----------|------------|-----|-------|------|------------|------------|--------------|------------|------------|---------|------------|-------------------|-----------|------------|----------|------------|-----------------------------------------------|----------|------|----------|--------|-----------------------------------|---------------------------------------------------------------------|----------|----------|----------|----------|----------|----------|----------|
| 1         | 02/01/2004 | 2   | 1     | 2004 | E. Africa  | Mozambique | 5            | 153        | 6          | 0       | unknown    | illegal mini work | unknown   | unknown    | unknown  | 0          | Tsiquiri region, Sofala province              |          |      | 1        |        | Collapsed illegal gold mine       | http://allafrica.com/stories/200401050521.html                      |          |          |          |          |          |          |          |
| 2         | 02/01/2004 | 2   | 1     | 2004 | S. Asia    | Pakistan   | 15           | 171        | 3          | 6       | constructi | constructi        | work      | adults     | unknown  | 0          | Shogran                                       |          |      | 3        |        | As per detail, labourer           | http://paktribune.com/news/index.php?id=50368                       |          |          |          |          |          |          |          |
| 3         | 03/01/2004 | 3   | 1     | 2004 | E. Asia    | China      | 6            | 49         | 16         | 0       | unknown    | houses            | home      | unknown    | unknown  | 0          | Jingpo Village, Linfen City, Shanxi, N. China |          |      |          |        | Destroyed and buried 5 houses     | http://news.xinhuanet.com/english/2004-01/04/content_1259821.htm    |          |          |          |          |          |          |          |
| 4         | 04/01/2004 | 4   | 1     | 2004 | S.E. Asia  | Indonesia  | 17           | 106        | 4          | 12      | rain       | houses            | home      | adults and | unknown  | 1          | Wanahayu village, Maja subdistri              |          |      | 0        |        | Knocked d 3 children and their m  | http://www.antara.co.id/e_berita.asp?id=129215&th=2004              |          |          |          |          |          |          |          |
| 5         | 11/01/2004 | 11  | 1     | 2004 | C. America | Mexico     | 2            | 145        | 2          | 12      | rain       | house             | home      | children   | unknown  | 0          | Pichucalco, c.80 kms                          |          |      | 0        |        | Buried hou 2 children killed      | http://www.contracostatimes.com/mld/cctimes/news/7690104.htm        |          |          |          |          |          |          |          |
| 6         | 11/01/2004 | 11  | 1     | 2004 | S. Asia    | Sri Lanka  | 15           | 217        | 3          | 12      | rain       | house             | home      | unknown    | unknown  | 0          | Walapane, Nuwara Eliya district               |          |      |          |        | Destroyed houses of 150 people    | http://www.dailynews.lk/2004/01/13/new12.html                       |          |          |          |          |          |          |          |
| 7         | 14/01/2004 | 14  | 1     | 2004 | S.E. Asia  | Malaysia   | 17           | 136        | 1          | 12      | rain       | house             | unknown   | unknown    | unknown  | 0          | Bau district, Birneo                          |          |      | 1        |        | buried hou ? 32 landslides in the | http://www.thestar.com.my/news/story.asp?file=/2004/1/25/nation/    |          |          |          |          |          |          |          |
| 8         | 15/01/2004 | 15  | 1     | 2004 | S. America | Brazil     | 14           | 33         | 3          | 12      | rain       | house             | unknown   | family     | unknown  | 0          | Xerem, Rio                                    |          |      |          |        | House crushed by landslide        | http://www.voanews.com/article.cfm?objectID=1C92EB95-FE54-4E9A-A619 |          |          |          |          |          |          |          |
| 9         | 29/01/2004 | 29  | 1     | 2004 | S.E. Asia  | Indonesia  | 17           | 106        | 15         | 0       | unknown    | village           | unknown   | unknown    | unknown  | 0          | Purworejo regency, in Mudslide?               |          |      |          |        | Buried houses in 2 villages       | http://www.thejakartapost.com/detailheadlines.asp?fileid=2004C      |          |          |          |          |          |          |          |
| 10        | 02/02/2004 | 2   | 2     | 2004 | S. Asia    | India      | 15           | 105        | 1          | 12      | rain       | road              | unknown   | unknown    | male     | 0          | Jammu-Srinagar national highway km 158        |          |      |          |        | Road bloc 210 vehicles trapped    | http://www.hinduonnet.com/thehindu/holnus/00402183011.htm           |          |          |          |          |          |          |          |

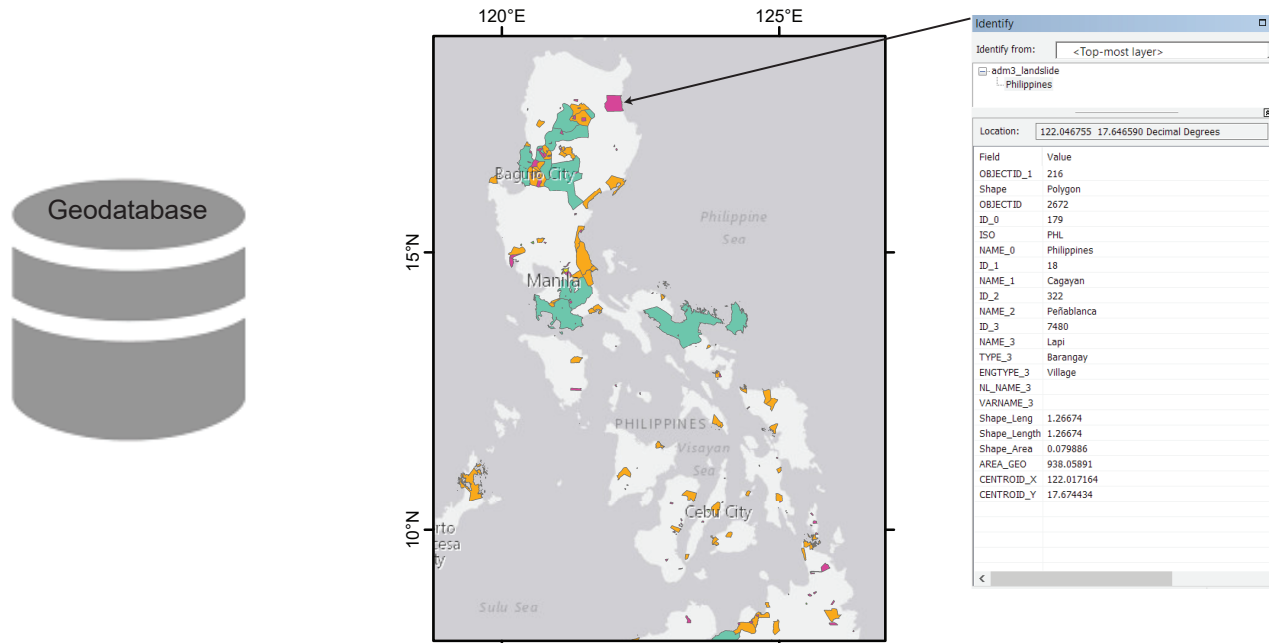

Figure S.1: The Global Fatal Landslide Database (GFLD) is currently managed across two platforms. (1) A spreadsheet containing information from each landslide report and the original report(s) text with source information (top). (2) A Geodatabase containing mapped polygons of the landslide report location. The precision of each landslide is variable. The coloured polygons in the map represent different administrative levels (regions, states, villages). In some cases individual failures can be identified from satellite imagery. Information about each landslide is contained in the attribute table of the polygon shapefile. The geodatabase is managed in ESRI ArcMap software. The GFLD will be hosted on a web platform later this year and will become open access.
